# Supplementary material
Source: PubMed Central journal article supplement (PMC8973998)

## **Full uncut gels**

**Title:** Exploration of group II metabotropic glutamate receptor modulation in mouse models of Rett syndrome and *MECP2* Duplication syndrome

**Authors:** Sheryl Anne D. Vermudez<sup>1</sup>, Aditi Buch<sup>1</sup>, Kelly Weiss<sup>1</sup>, Rocco G. Gogliotti<sup>2</sup>, and Colleen M. Niswender<sup>1,3,4,5\*</sup>

**Affiliations:** <sup>1</sup>Department of Pharmacology and Warren Center for Neuroscience Drug Discovery, Vanderbilt University, Nashville, TN 37232, USA

<sup>2</sup>Department of Molecular Pharmacology and Neuroscience, Loyola University Chicago, IL 60660, USA

<sup>3</sup>Vanderbilt Kennedy Center, Vanderbilt University, Nashville, TN 37232, USA

<sup>4</sup>Vanderbilt Institute of Chemical Biology, Vanderbilt University, Nashville, TN 37232, USA

<sup>5</sup>Vanderbilt Brain Institute, Vanderbilt University, Nashville, TN 37232, USA

### **\*Corresponding author**

Colleen M. Niswender

12478C MRB IV

Vanderbilt University

Nashville, TN 37232

Office: (615) 343-4303

Fax: (615) 343-3088

[Colleen.niswender@vanderbilt.edu](mailto:Colleen.niswender@vanderbilt.edu)

### **Declaration of Interest**

C.M.N. receives research support and licensing revenue from Boehringer-Ingelheim for the development of mGlu<sub>3</sub> ligands and is an inventor on multiple patents for mGlu receptor allosteric modulators.

Full unedited gel for Figure 1D (Quantification in Figure 1E)

Mouse line: *Mecp2*<sup>Null/+</sup>

Brain Region: Cortex

Antibody: Mouse anti-mGlu<sub>2</sub> (1:1000, Abcam cat. no. ab15672)

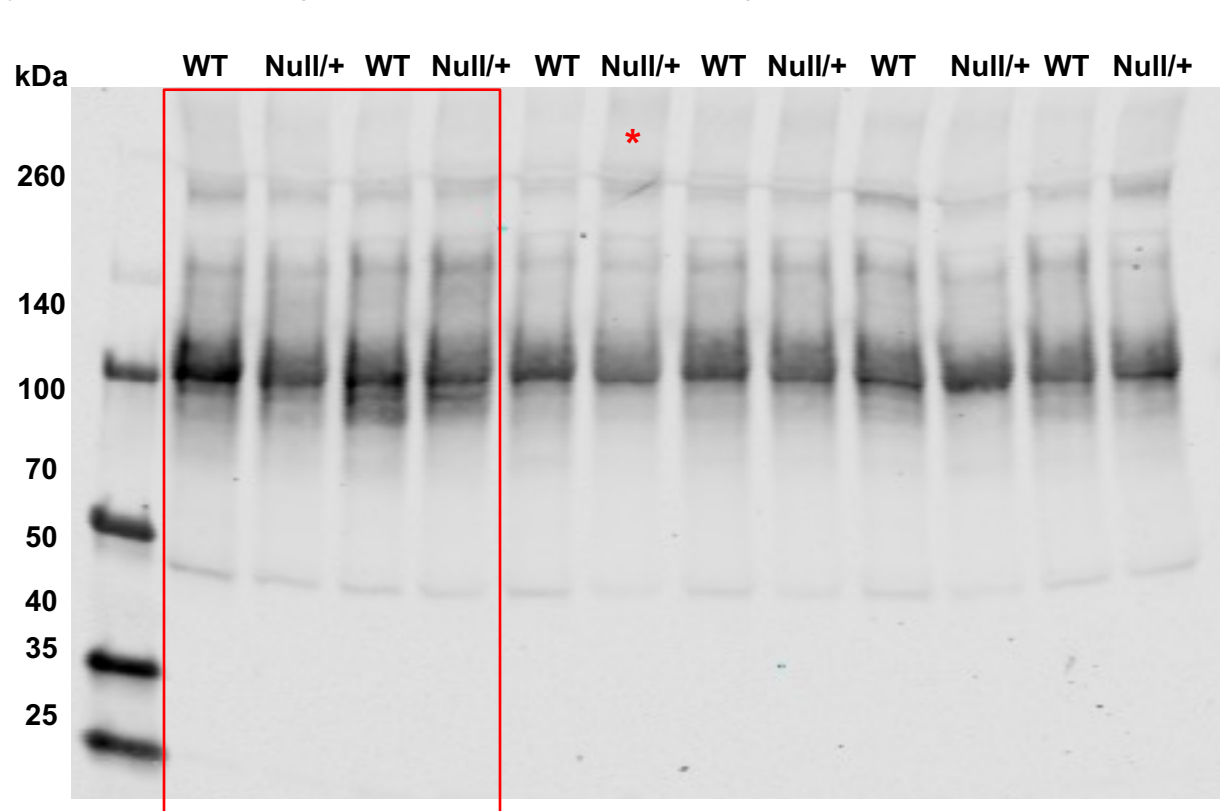

WT (*Mecp2*<sup>+/+</sup>)

Null/+ (*Mecp2*<sup>Null/+</sup>)

< D (Dimer)

Figure 1D

\*Artifact on band; sample excluded from quantification

Full unedited gel for Figure 1D (Quantification in Figure 1E)  
Mouse line: *Mecp2*<sup>Null/+</sup>  
Brain Region: Cortex  
Antibody: Mouse anti-Gapdh (1:1000, ThermoFisher cat. no. MA5-15738)

WT (*Mecp2*<sup>+/+</sup>)  
Null/+ (*Mecp2*<sup>Null/+</sup>)

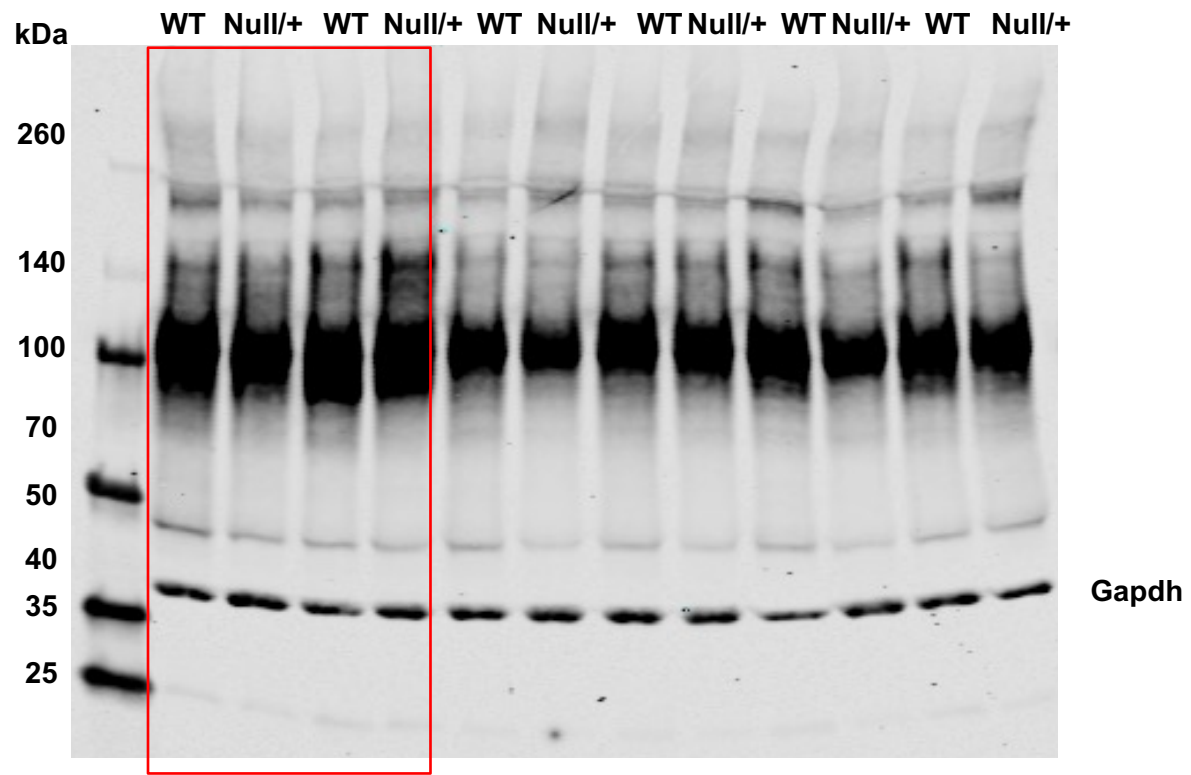

Figure 1D

Full unedited gel for Figure 1D (Quantification in Figure 1E)  
Mouse line: *Mecp2*<sup>Null/+</sup>  
Brain Region: Cortex  
Antibody: Rabbit anti-mGlu<sub>3</sub> (1:1000, Alomone, cat. no. AGC\_012)

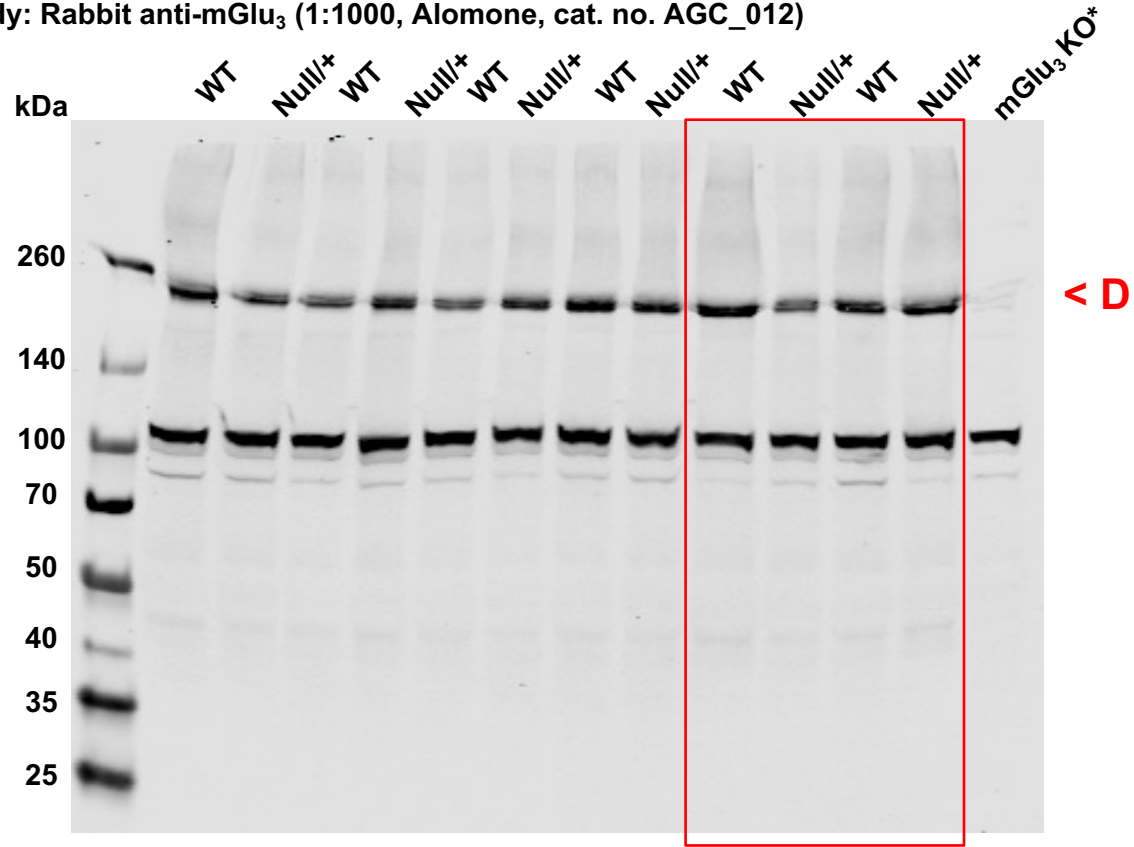

WT (*Mecp2*<sup>+/+</sup>)  
Null/+ (*Mecp2*<sup>Null/+</sup>)

< D (Dimer)

\*mGlu<sub>3</sub> KO (knockout) mouse  
previously characterized in  
Dogra et. al., 2021, Biol.  
Psychiatry

Figure 1D

Full unedited gel for Figure 1D (Quantification in Figure 1E)

Mouse line: *Mecp2*<sup>Null/+</sup>

Brain Region: Cortex

Antibody: Mouse anti-Gapdh (1:1000, ThermoFisher cat. no. MA5-15738)

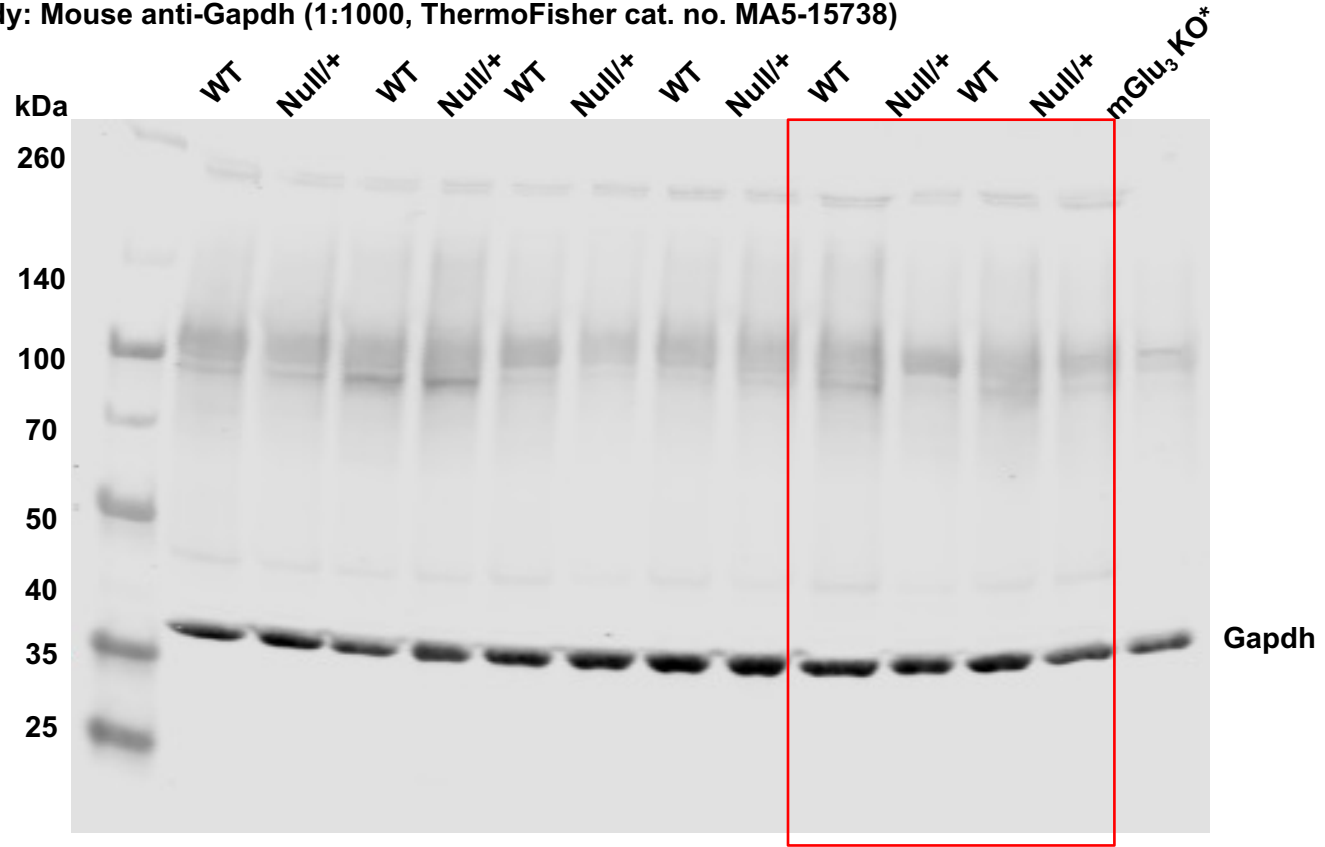

WT (*Mecp2*<sup>+/+</sup>)  
Null/+ (*Mecp2*<sup>Null/+</sup>)

\*mGlu<sub>3</sub> KO (knockout) mouse  
previously characterized in  
Dogra et. al., 2021, Biol.  
Psychiatry

Figure 1D

Full unedited gel for Supplementary Figure 1A (Quantification in Supplementary Figure 1B)

Mouse line: *Mecp2*<sup>Null/+</sup>

Brain Region: Hippocampus

Antibody: Rabbit anti-MeCP2 (1:1000, Millipore, cat. no. 07-013)

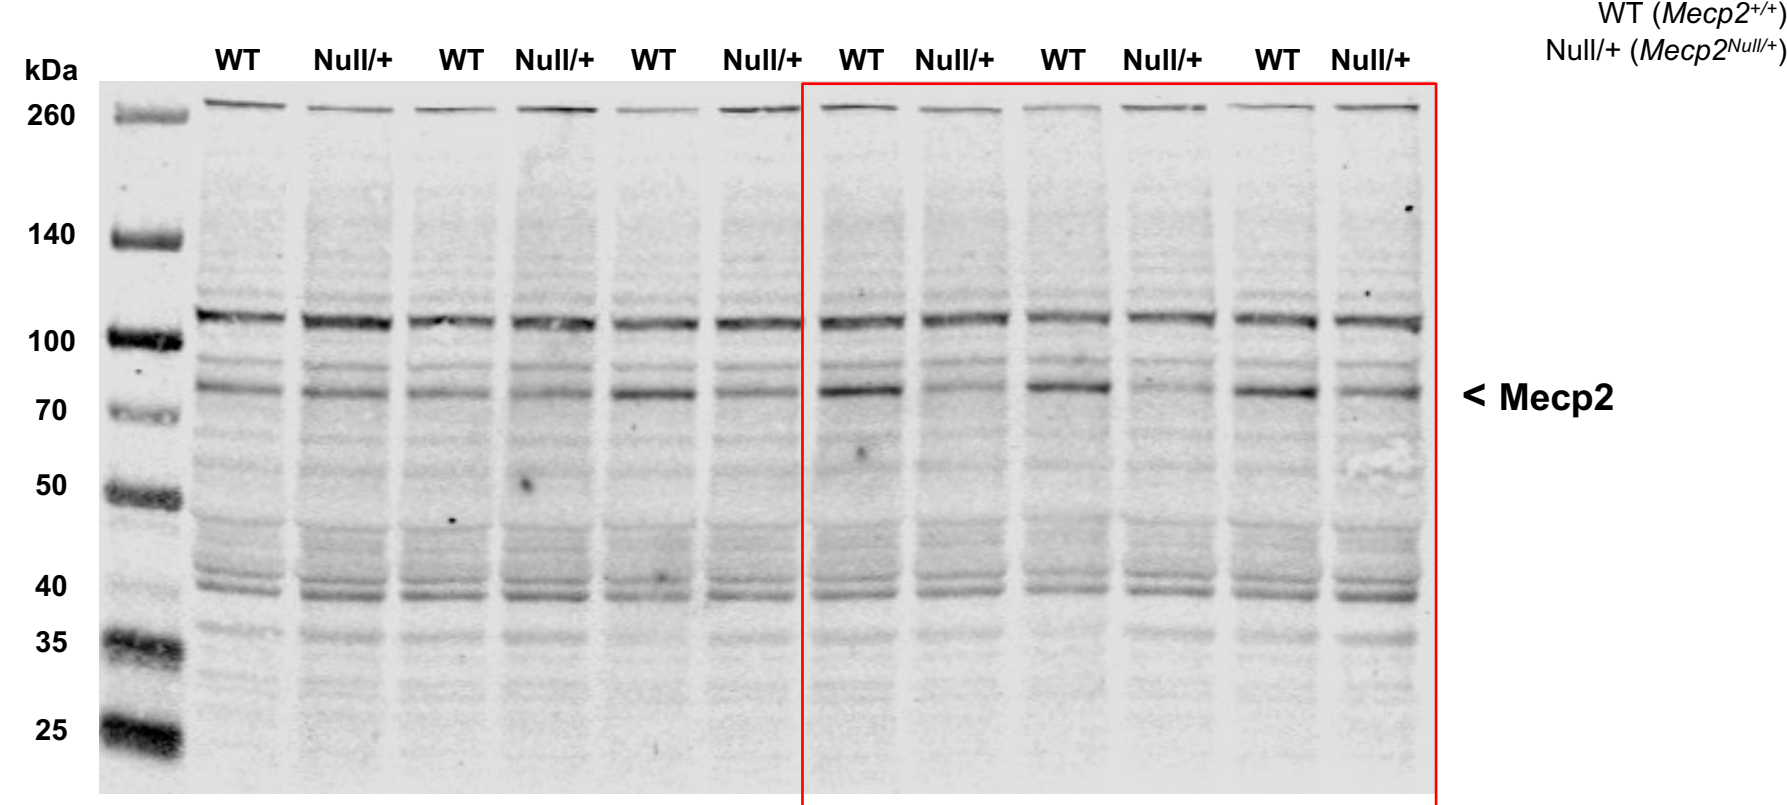

Supplementary Figure 1A

Full unedited gel for Supplementary Figure 1A (Quantification in Supplementary Figure 1B)

Mouse line: *Mecp2*<sup>Null/+</sup>

Brain Region: Hippocampus

Antibody: Mouse anti-Gapdh (1:1000, ThermoFisher cat. no. MA5-15738)

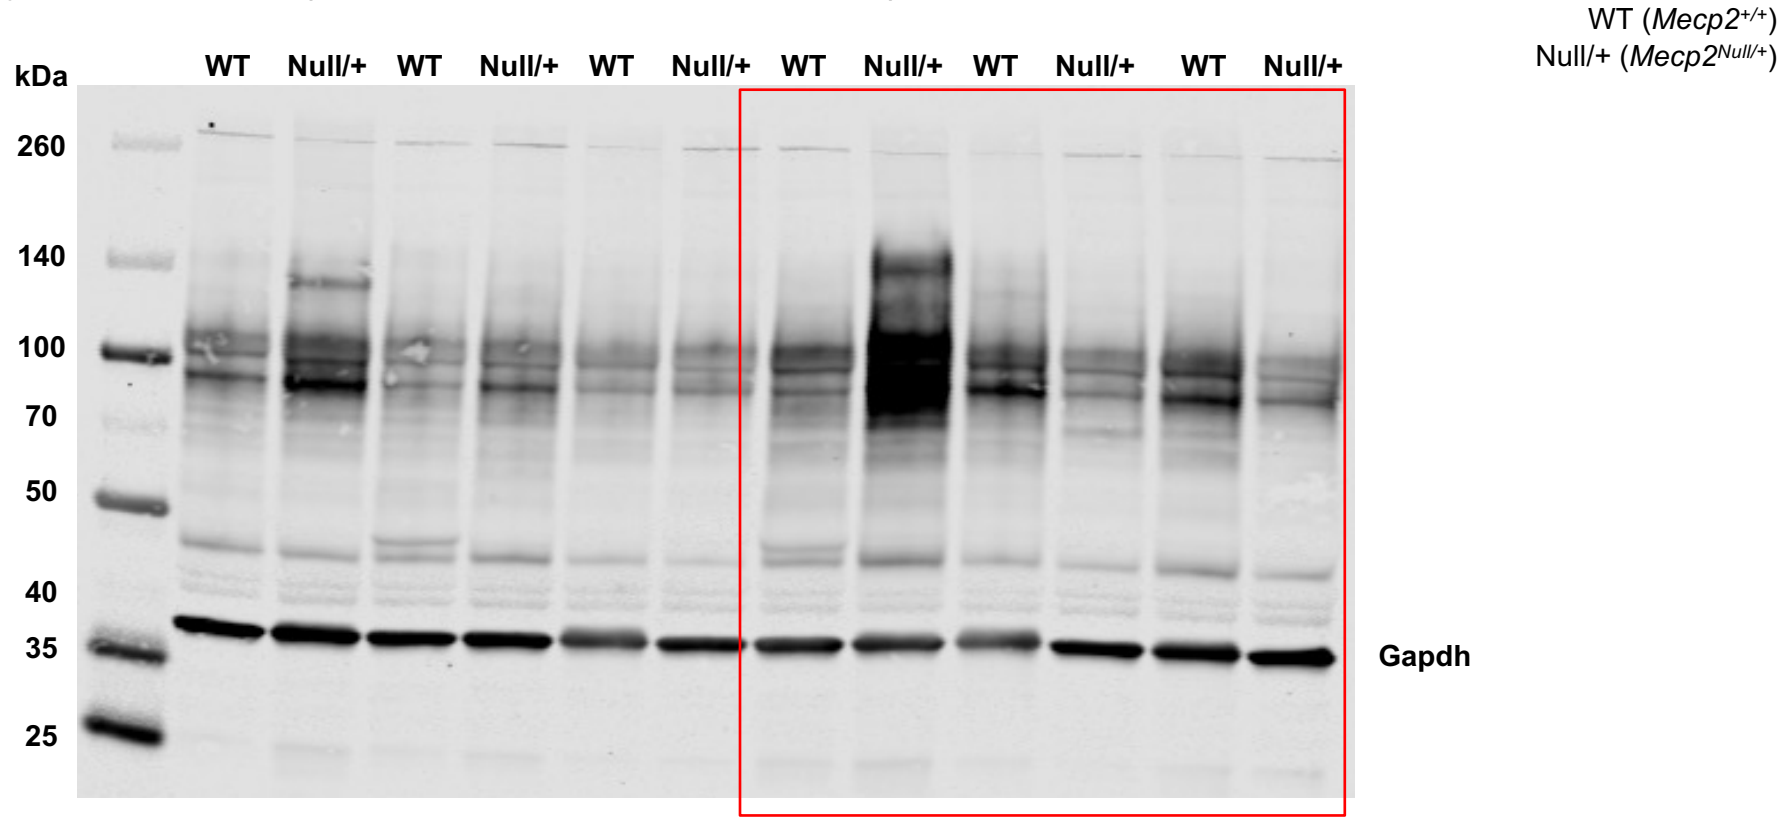

Supplementary Figure 1A

Full unedited gel for Figure 1F (Quantification in Figure 1G)

Mouse line: *Mecp2*<sup>Null/+</sup>

Brain Region: Hippocampus

Antibody: Mouse anti-mGlu<sub>2</sub> (1:1000, Abcam cat. no. ab15672)

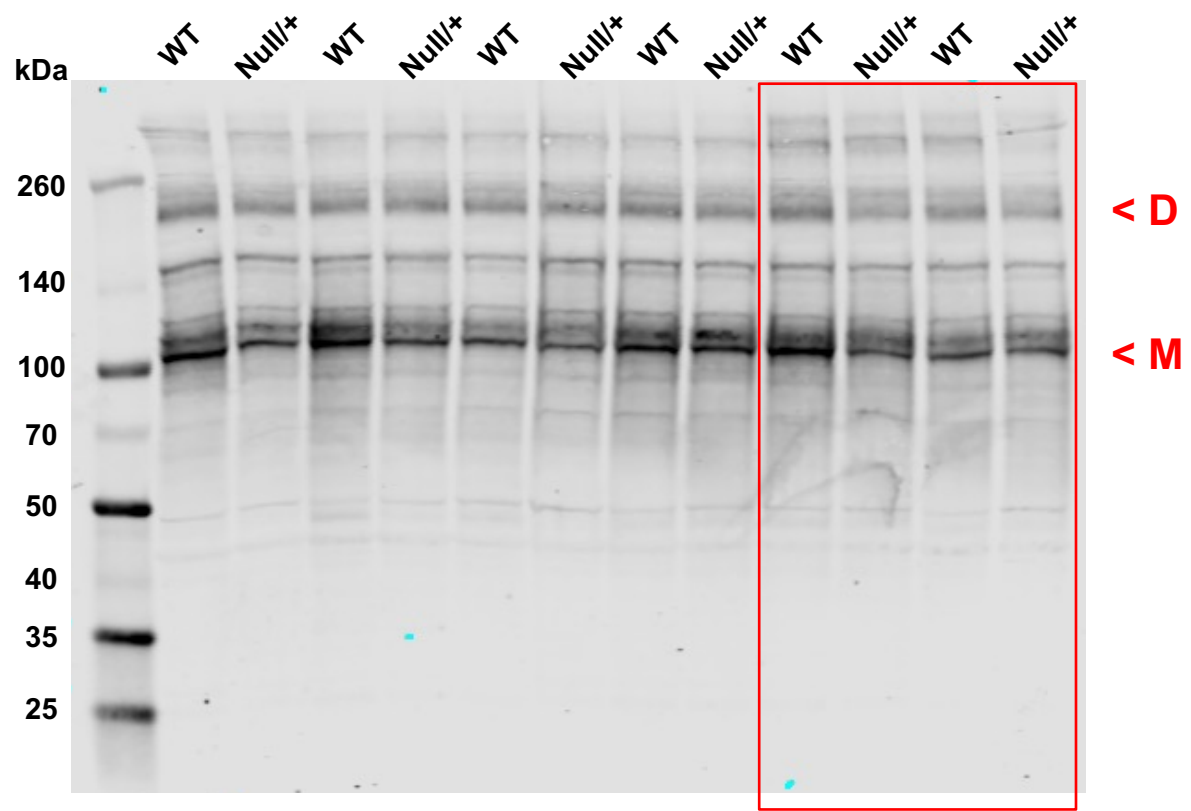

WT (*Mecp2*<sup>+/+</sup>)  
Null/+ (*Mecp2*<sup>Null/+</sup>)

< D (Dimer)  
< M (Monomer)

Figure 1F



Full unedited gel for Figure 1F (Quantification in Figure 1G)

Mouse line: *Mecp2*<sup>Null/+</sup>

Brain Region: Hippocampus

Antibody: Mouse anti-Gapdh (1:1000, ThermoFisher cat. no. MA5-15738)

WT (*Mecp2*<sup>+/+</sup>)  
Null/+ (*Mecp2*<sup>Null/+</sup>)

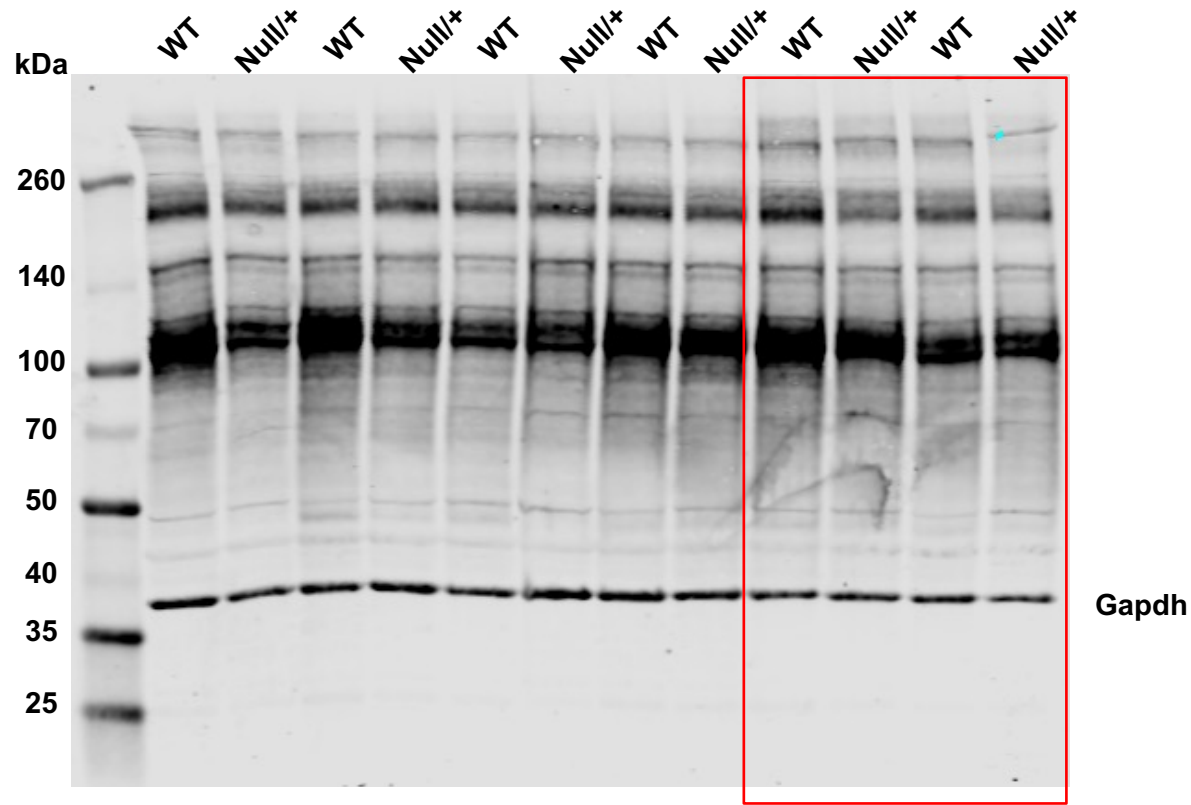

Figure 1F

Full unedited gel for Figure 1F (Quantification in Figure 1G)  
Mouse line: *Mecp2*<sup>Null/+</sup>  
Brain Region: Hippocampus  
Antibody: Rabbit anti-vGlut2 (1:1000, cat. no. Cell Signaling Technology, 71555)

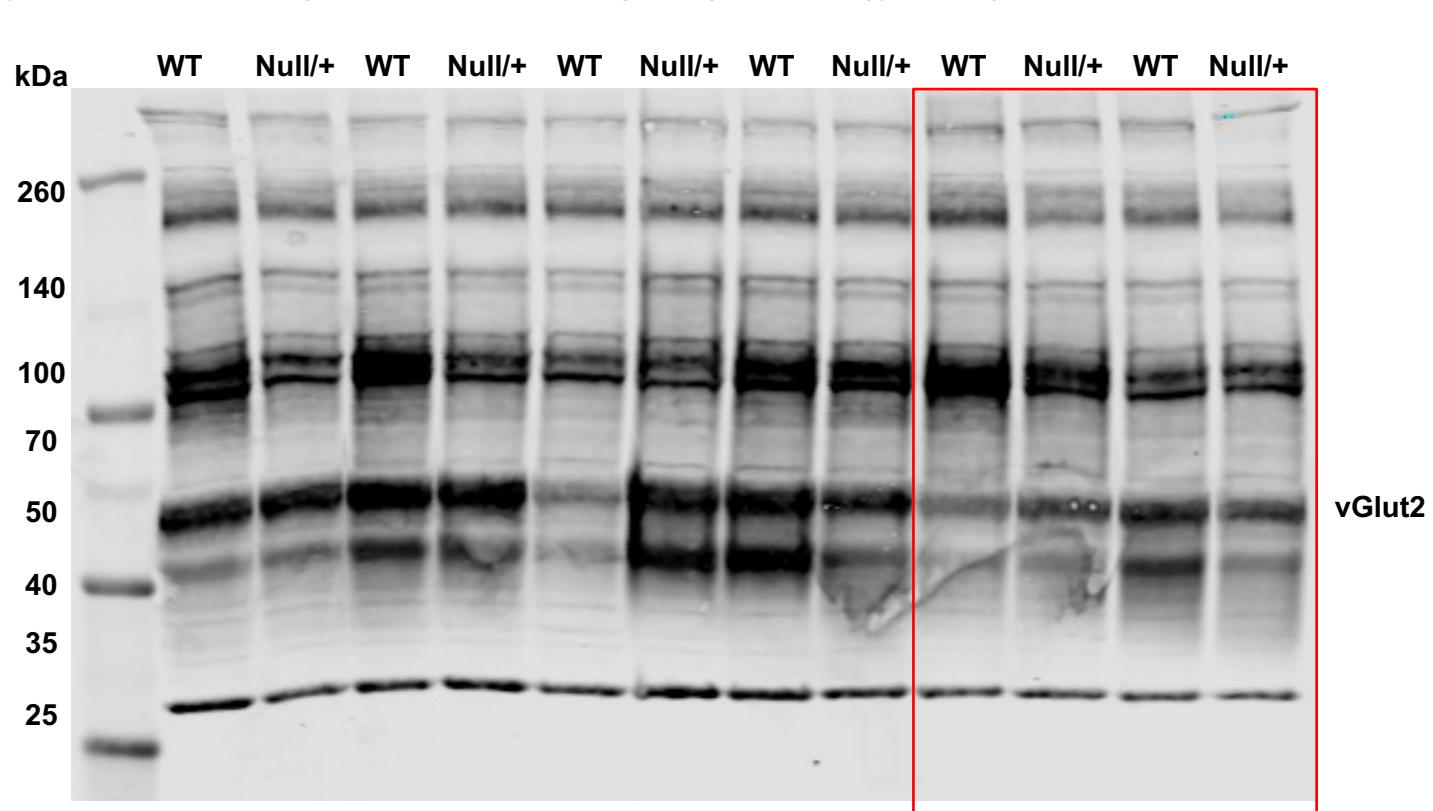

WT (*Mecp2*<sup>+/+</sup>)  
Null/+ (*Mecp2*<sup>Null/+</sup>)

Figure 1F

Full unedited gel for Figure 1F (Quantification in Figure 1G)  
Mouse line: *Mecp2*<sup>Null/+</sup>  
Brain Region: Hippocampus  
Antibody: Rabbit anti-mGlu<sub>3</sub> (1:1000, Alomone, cat. no. AGC\_012)

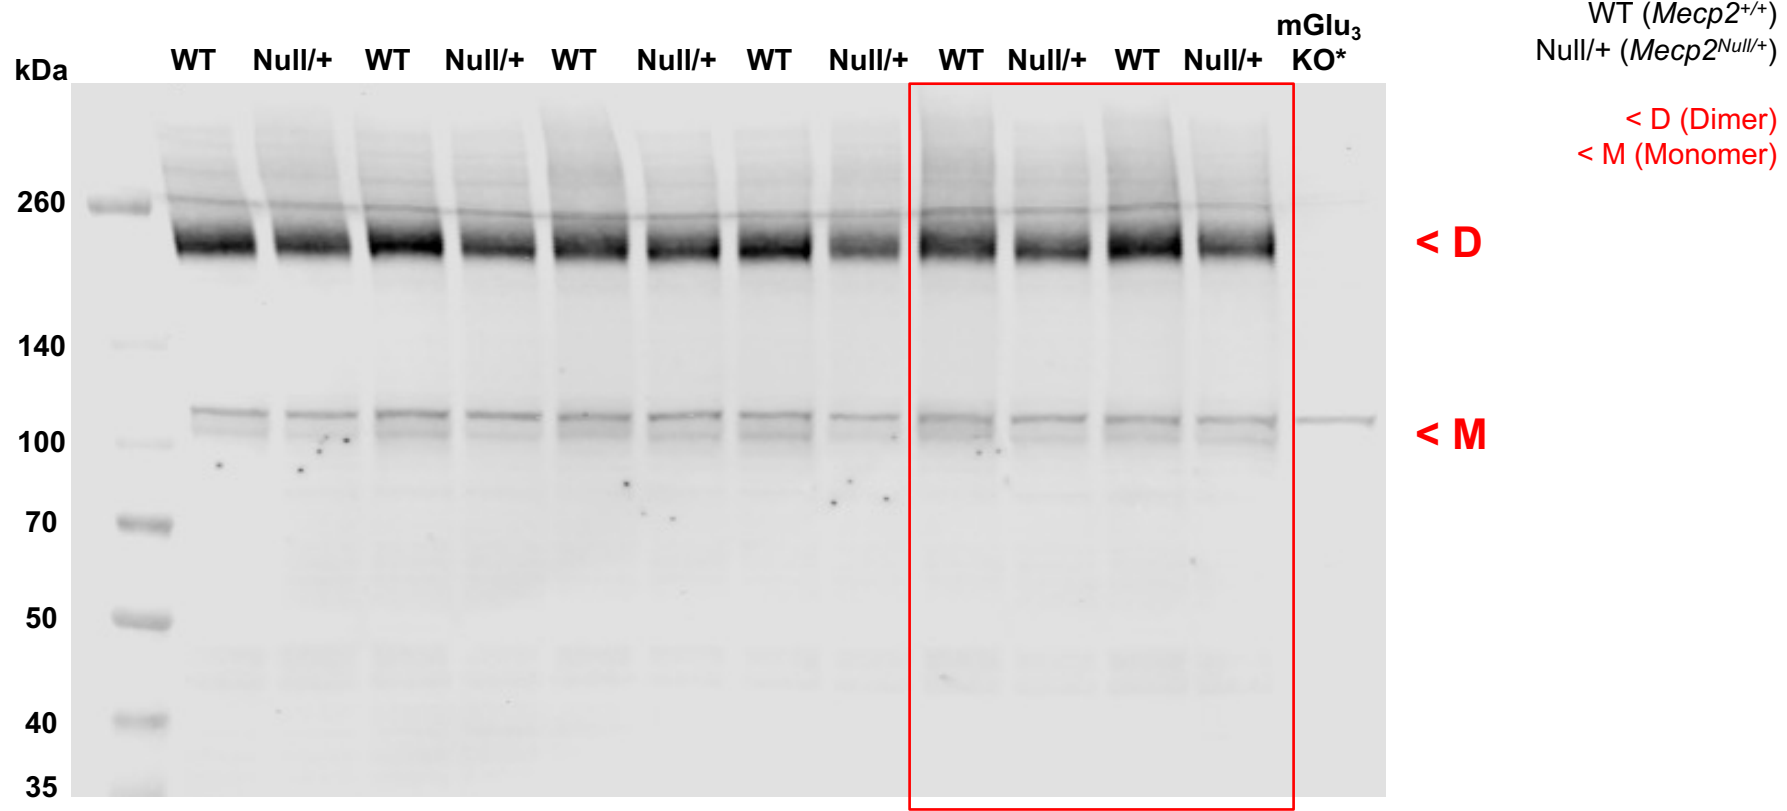

Figure 1F

\*mGlu<sub>3</sub> KO (knockout) mouse previously characterized in Dogra et. al., 2021, Biol. Psychiatry

Full unedited gel for Figure 1F (Quantification in Figure 1G)  
Mouse line: *Mecp2*<sup>Null/+</sup>  
Brain Region: Hippocampus  
Antibody: Mouse anti-Gapdh (1:1000, ThermoFisher cat. no. MA5-15738)

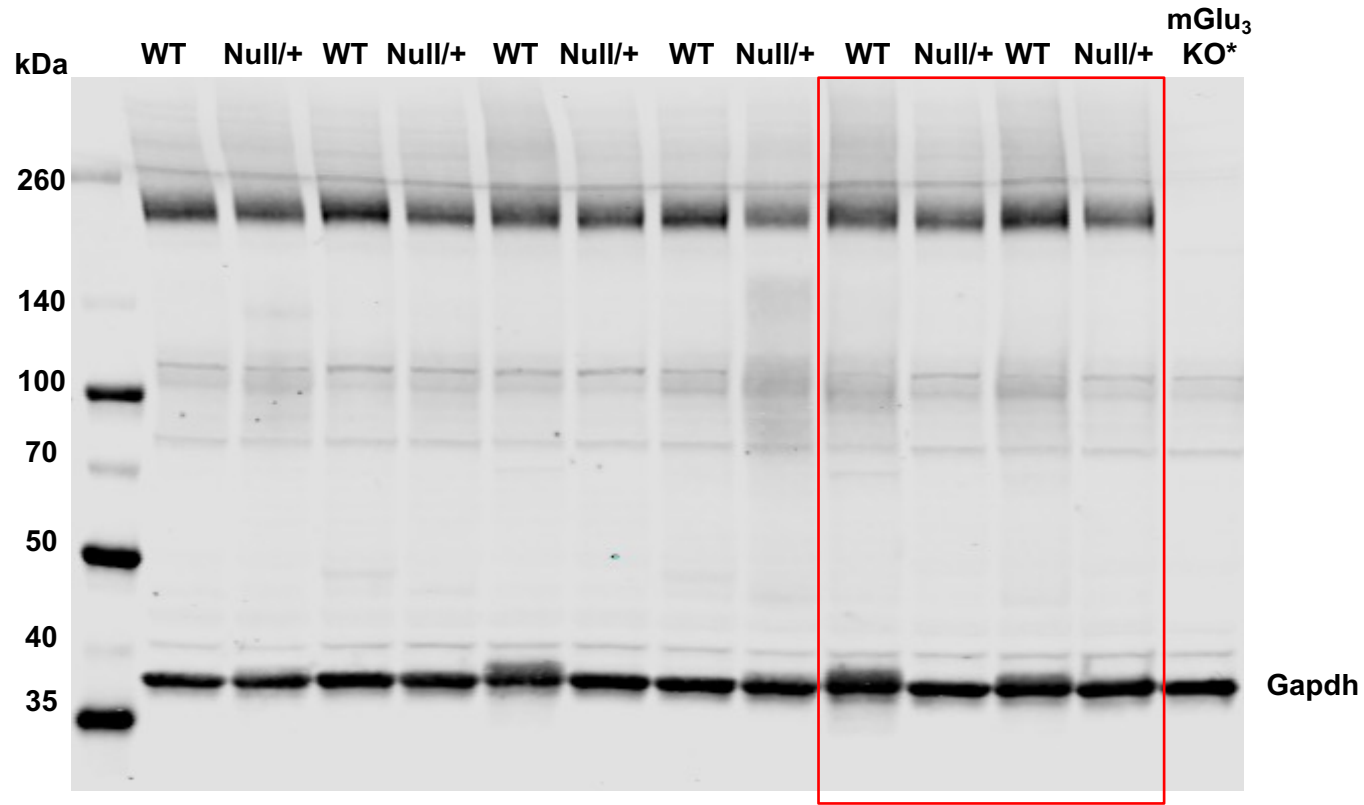

WT (*Mecp2*<sup>+/+</sup>)  
Null/+ (*Mecp2*<sup>Null/+</sup>)

Figure 1F

\*mGlu<sub>3</sub> KO (knockout) mouse previously characterized in Dogra et. al., 2021, Biol. Psychiatry

Full unedited gel for Figure 2B (Quantification in Figure 2C)

Mouse line: *MECP2<sup>Tg1/o</sup>*

Brain Region: Hippocampus

Antibody: Rabbit anti-MeCP2 (1:1000, Millipore, cat. no. 07-013)

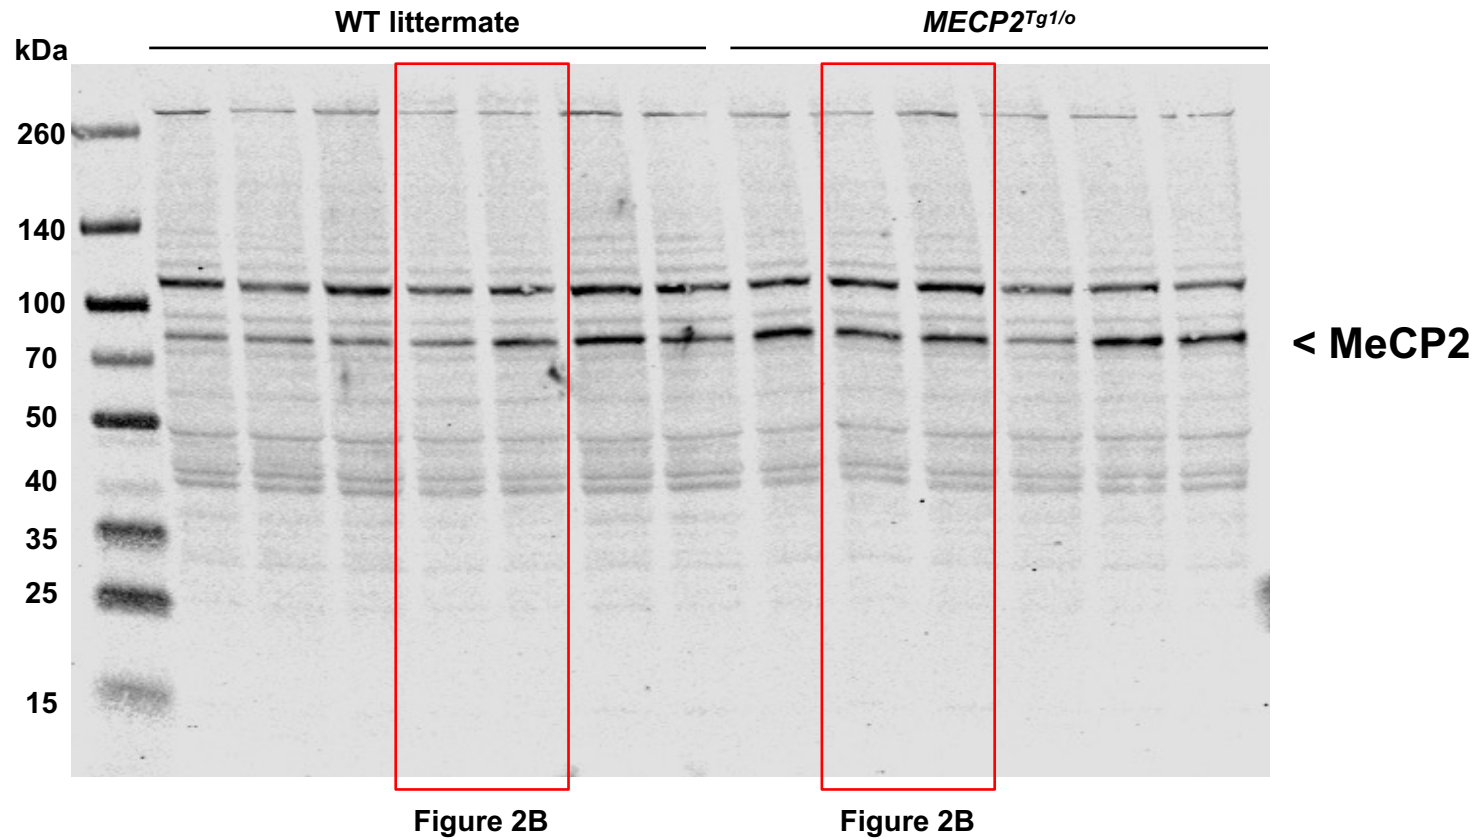

Full unedited gel for Figure 2B (Quantification in Figure 2C)  
Mouse line: *MECP2<sup>Tg1/o</sup>*  
Brain Region: Hippocampus  
Antibody: Mouse anti-Gapdh (1:1000, ThermoFisher cat. no. MA5-15738)

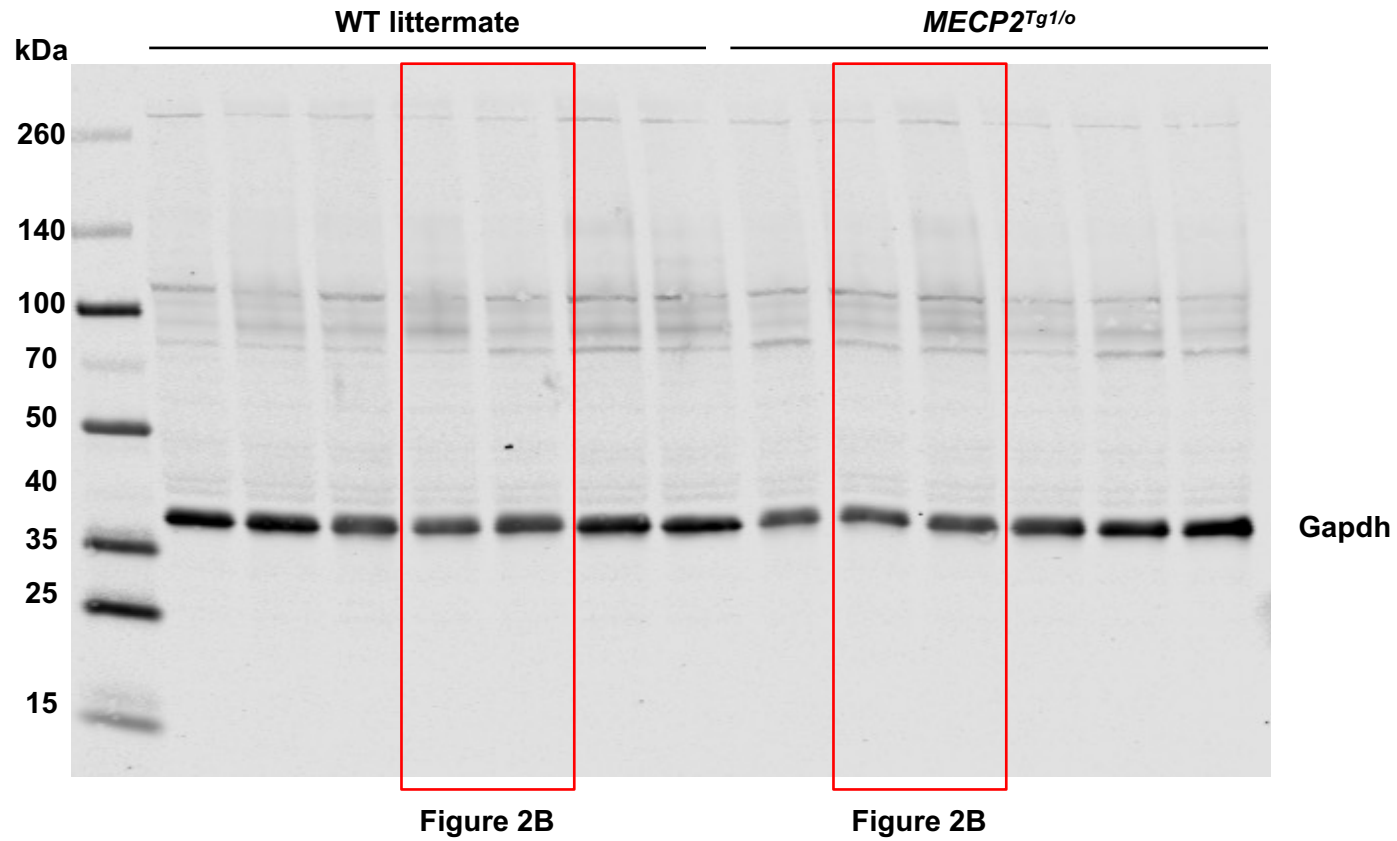

Full unedited gel for Figure 2B (Quantification in Figure 2C)

Mouse line: *MECP2<sup>Tg1/o</sup>*

Brain Region: Hippocampus

Antibody: Rabbit anti-vGlut2 (1:1000, cat. no. Cell Signaling Technology, 71555)

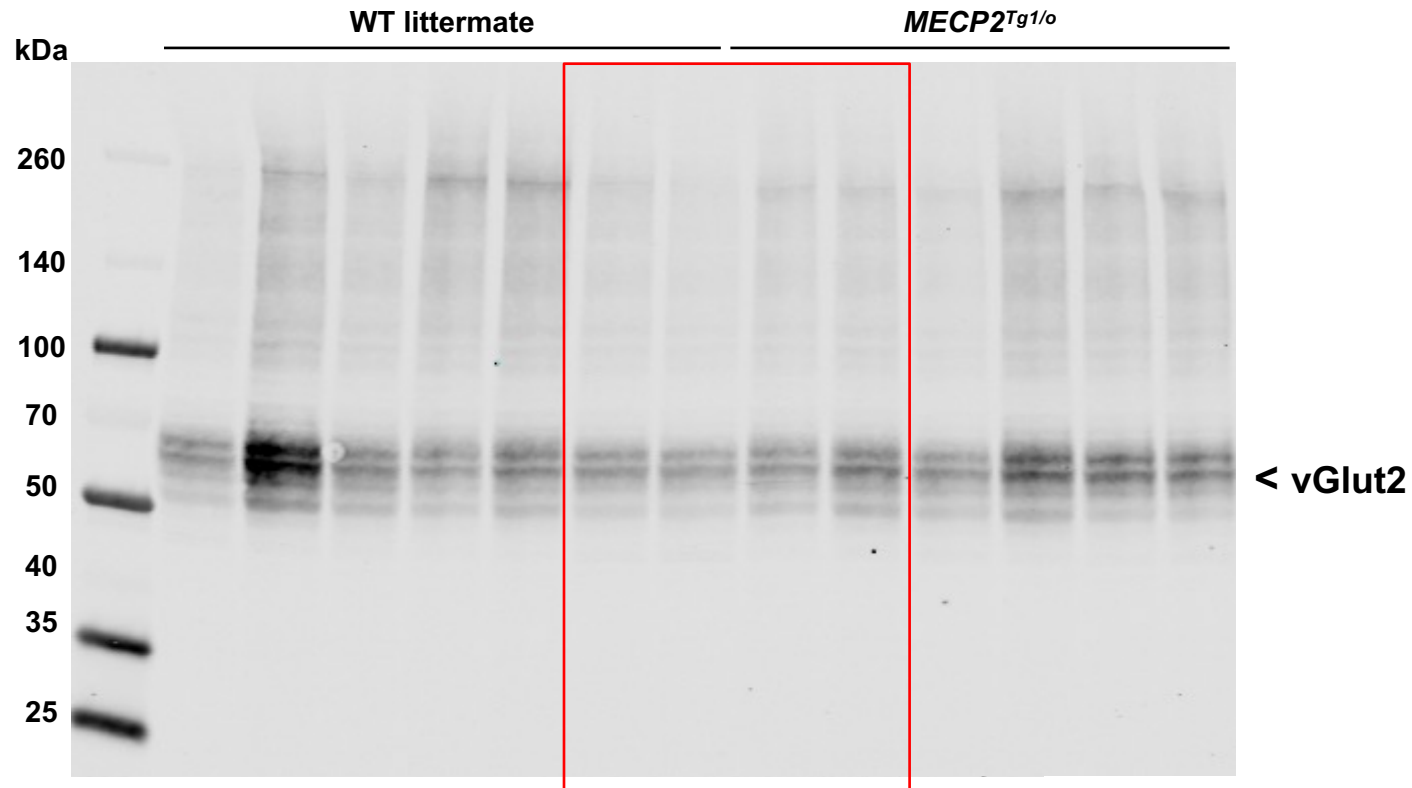

Figure 2B

Full unedited gel for Figure 2B (Quantification in Figure 2C)  
Mouse line: *MECP2<sup>Tg1/o</sup>*  
Brain Region: Hippocampus  
Antibody: Mouse anti-Gapdh (1:1000, ThermoFisher cat. no. MA5-15738)

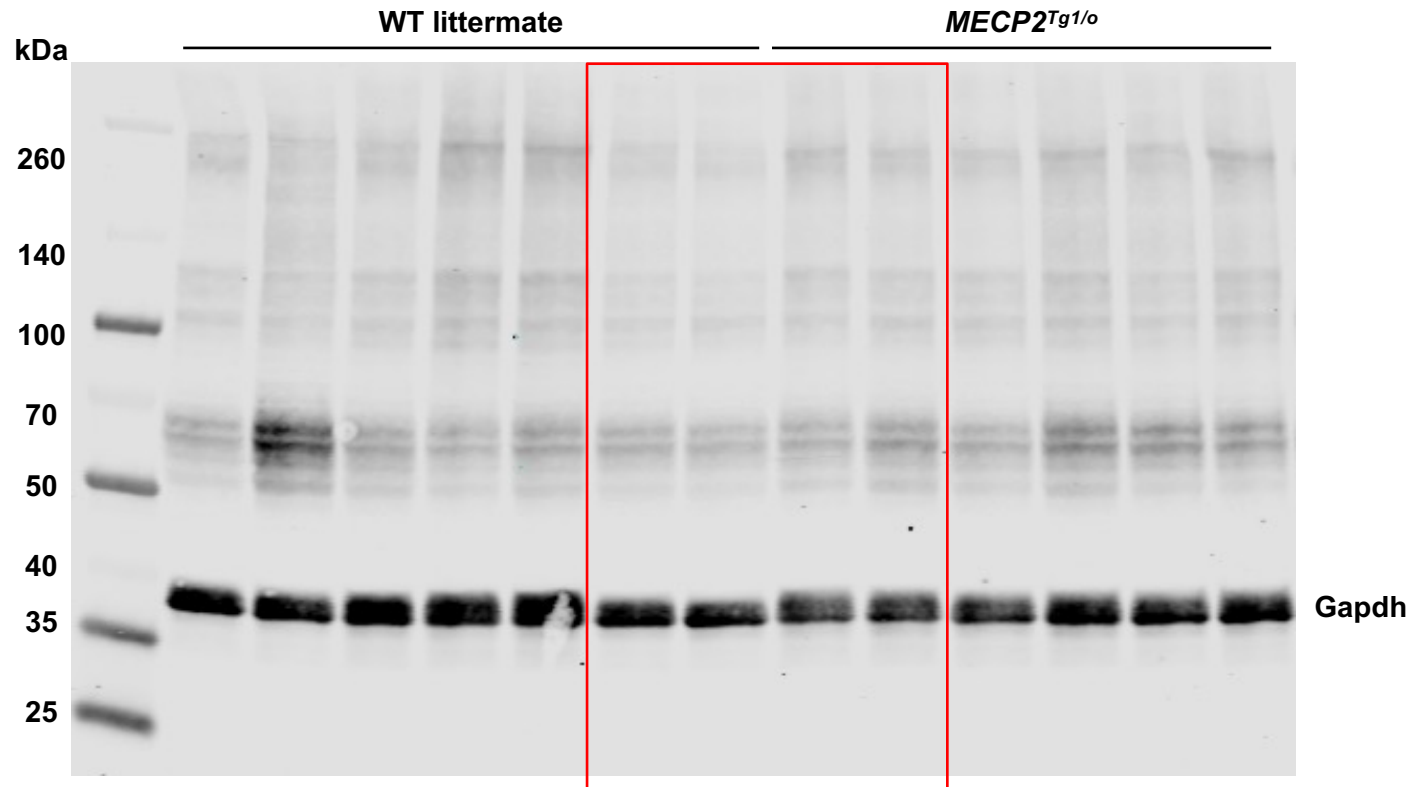

Figure 2B



Full unedited gel for Figure 2B (Quantification in Figure 2C)  
Mouse line: *MECP2<sup>Tg1/o</sup>*  
Brain Region: Hippocampus  
Antibody: Mouse anti-mGlu<sub>2</sub> (1:1000, Abcam cat. no. ab15672)

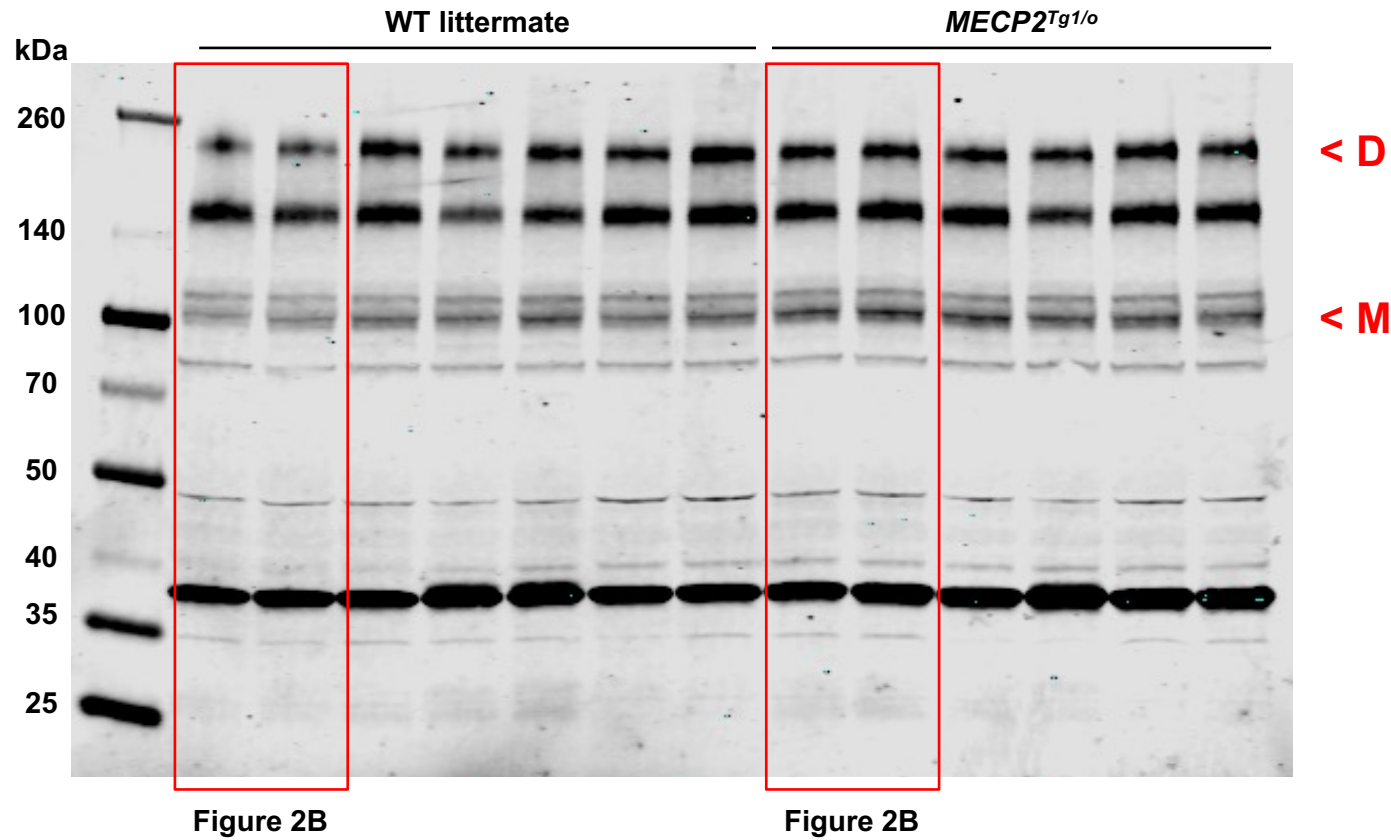

Full unedited gel for Figure 2B (Quantification in Figure 2C)  
Mouse line: *MECP2<sup>Tg1/o</sup>*  
Brain Region: Hippocampus  
Antibody: Rabbit anti-mGlu<sub>3</sub> (1:1000, Alomone, cat. no. AGC\_012)

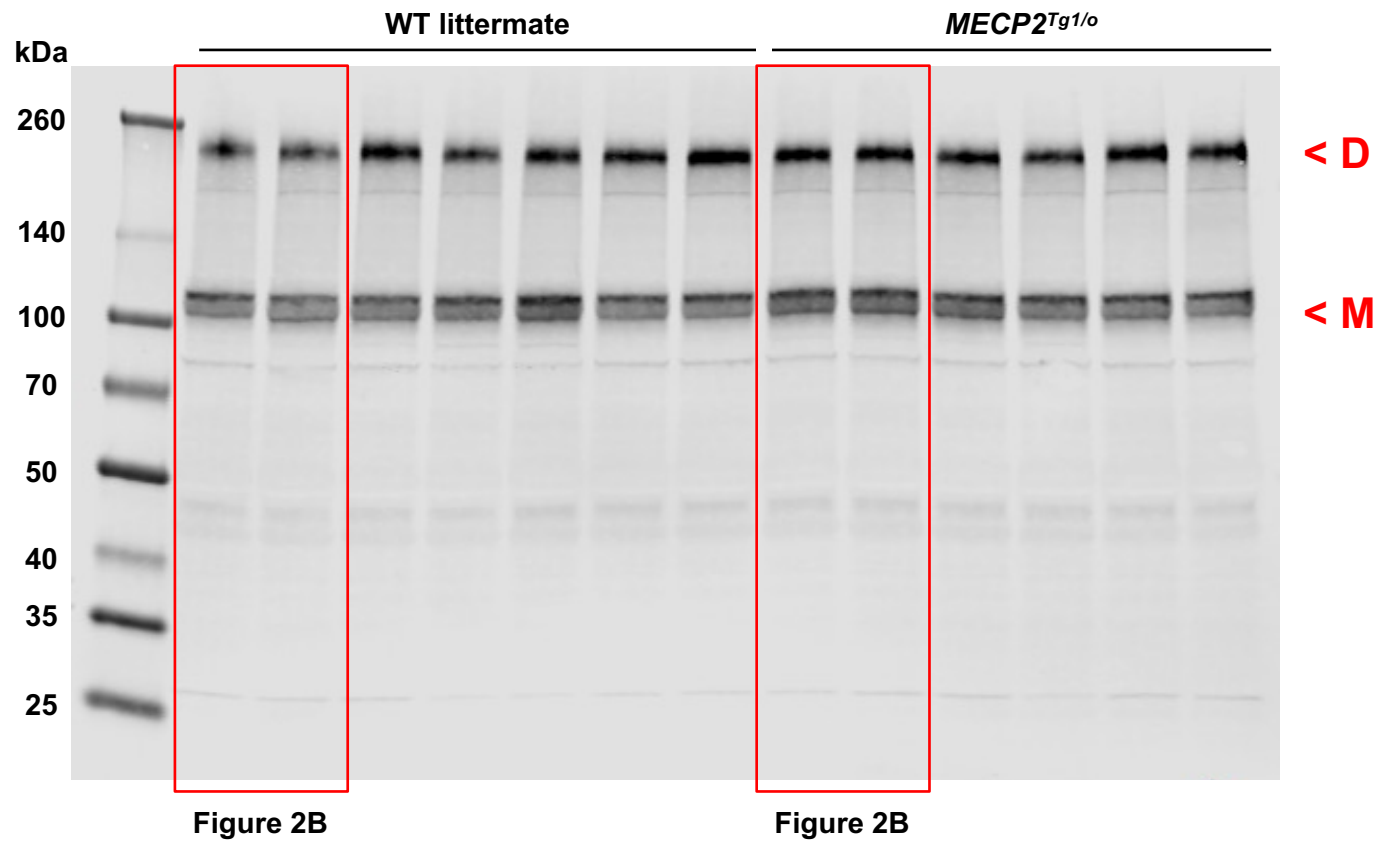

< D (Dimer)  
< M (Monomer)

Full unedited gel for Figure 2B (Quantification in Figure 2C)  
Mouse line: *MECP2<sup>Tg1/o</sup>*  
Brain Region: Hippocampus  
Antibody: Mouse anti-Gapdh (1:1000, ThermoFisher cat. no. MA5-15738)

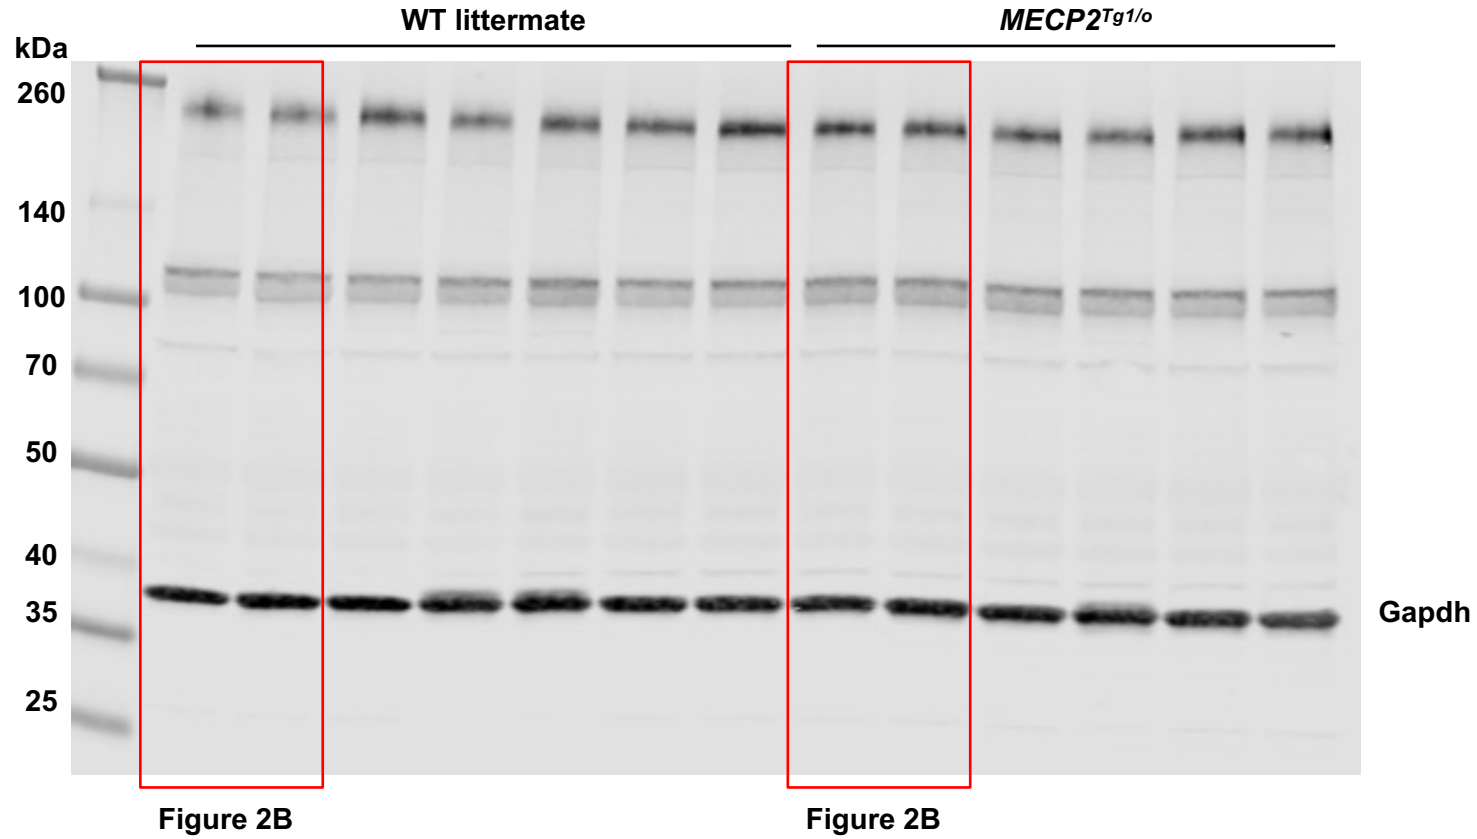

Supplement: NIHMS1786625-supplement-2.pdf [file NIHMS1786625-supplement-2.pdf]
